# Supplementary material for: Is There an Association between Health Risk Behaviours and Academic Achievement among University Students?
Source: MDPI journal article supplement (doi:10.3390/ijerph18168314), 2021-08-05
Supplement: s1 [file s1]

**Table S1.** Linear regression results of academic achievement (GPA) with heath risk behaviours, adjusted for socio-demographics and student characteristics in a sample of Australian university students (n = 1543).

| Modifiable Lifestyle Risk Factor             | Academic Achievement (GPA)        |       |                   |
|----------------------------------------------|-----------------------------------|-------|-------------------|
|                                              | $\beta$ -Coefficient <sup>a</sup> | SE    | p                 |
| <i>Not meeting fruit recommendations</i>     | -0.203                            | 0.057 | <b>&lt; 0.001</b> |
| Age                                          | 0.008                             | 0.005 | 0.097             |
| Male                                         | -0.215                            | 0.066 | <b>0.001</b>      |
| International                                | -0.323                            | 0.129 | <b>0.013</b>      |
| Postgraduate                                 | 0.333                             | 0.096 | <b>0.001</b>      |
| Faculty of study                             |                                   |       |                   |
| Reference: Health & Medicine                 |                                   |       |                   |
| Business & Law                               | -0.232                            | 0.091 | <b>0.011</b>      |
| Education & Arts                             | -0.043                            | 0.076 | 0.571             |
| Engineering & Built Environment              | -0.048                            | 0.100 | 0.634             |
| Science                                      | -0.045                            | 0.086 | 0.599             |
| Living situation                             |                                   |       |                   |
| Reference: Parents' home                     |                                   |       |                   |
| Own home                                     | -0.024                            | 0.115 | 0.836             |
| On-campus residences                         | -0.053                            | 0.109 | 0.626             |
| Renting                                      | -0.133                            | 0.069 | 0.056             |
| Others                                       | -0.107                            | 0.179 | 0.551             |
| Receiving financial support                  | -0.001                            | 0.060 | 0.991             |
| <i>Not meeting vegetable recommendations</i> | -0.125                            | 0.097 | 0.197             |
| Age                                          | 0.010                             | 0.005 | <b>0.027</b>      |
| Male                                         | -0.209                            | 0.067 | <b>0.002</b>      |
| International                                | -0.230                            | 0.127 | 0.071             |
| Faculty of study                             |                                   |       |                   |
| Reference: Health & Medicine                 |                                   |       |                   |
| Business & Law                               | -0.205                            | 0.092 | <b>0.025</b>      |
| Education & Arts                             | -0.045                            | 0.077 | 0.561             |
| Engineering & Built Environment              | -0.071                            | 0.101 | 0.481             |
| Science                                      | -0.060                            | 0.087 | 0.492             |
| Living situation                             |                                   |       |                   |
| Reference: Parents' home                     |                                   |       |                   |
| Own home                                     | 0.031                             | 0.115 | 0.786             |
| On-campus residences                         | -0.054                            | 0.110 | 0.623             |
| Renting                                      | -0.125                            | 0.070 | 0.073             |

|                                           |                                |       |                   |
|-------------------------------------------|--------------------------------|-------|-------------------|
| Others                                    | -0.096                         | 0.180 | 0.596             |
| Receiving financial support               | 0.025                          | 0.060 | 0.674             |
| <i>Soft drink &gt; 1 cup per week</i>     | -0.307                         | 0.066 | <b>&lt; 0.001</b> |
| Age                                       | 0.007                          | 0.005 | 0.128             |
| Male                                      | -0.198                         | 0.067 | <b>0.003</b>      |
| Non-ATSI                                  | 0.003                          | 0.142 | 0.984             |
| International                             | -0.328                         | 0.132 | <b>0.013</b>      |
| Postgraduate                              | 0.323                          | 0.101 | <b>0.001</b>      |
| Faculty of study                          |                                |       |                   |
| Reference: Health & Medicine              |                                |       |                   |
| Business & Law                            | -0.200                         | 0.094 | <b>0.033</b>      |
| Education & Arts                          | Automatically excluded by SPSS |       |                   |
| Engineering & Built Environment           | -0.039                         | 0.102 | 0.704             |
| Science                                   | -0.015                         | 0.088 | 0.863             |
| Year of program                           |                                |       |                   |
| Reference: 1 <sup>st</sup> year           |                                |       |                   |
| 2 <sup>nd</sup> year                      | 0.093                          | 0.077 | 0.226             |
| 3 <sup>rd</sup> year                      | -0.045                         | 0.078 | 0.564             |
| 4 <sup>th</sup> year                      | 0.055                          | 0.095 | 0.563             |
| 5 <sup>th</sup> year and above            | 0.015                          | 0.108 | 0.889             |
| Living situation                          |                                |       |                   |
| Reference: Parents' home                  |                                |       |                   |
| Own home                                  | 0.102                          | 0.106 | 0.337             |
| On-campus residences                      | 0.110                          | 0.112 | 0.324             |
| Renting                                   | Automatically excluded by SPSS |       |                   |
| Others                                    | 0.074                          | 0.179 | 0.681             |
| Paid work (hours/week)                    | -0.001                         | 0.002 | 0.684             |
| <i>Takeaway food ≥ 1 time(s) per week</i> | -0.130                         | 0.060 | <b>0.029</b>      |
| Age                                       | 0.007                          | 0.005 | 0.148             |
| Male                                      | -0.213                         | 0.067 | <b>0.001</b>      |
| Non-ATSI                                  | 0.002                          | 0.142 | 0.989             |
| International                             | -0.347                         | 0.129 | <b>0.007</b>      |
| Postgraduate                              | 0.320                          | 0.096 | <b>0.001</b>      |
| Faculty of study                          |                                |       |                   |
| Reference: Health & Medicine              |                                |       |                   |
| Business & Law                            | -0.222                         | 0.092 | <b>0.016</b>      |
| Education & Arts                          | -0.037                         | 0.077 | 0.629             |
| Engineering & Built Environment           | -0.060                         | 0.101 | 0.555             |

|                                                      |        |       |                   |
|------------------------------------------------------|--------|-------|-------------------|
| Science                                              | -0.044 | 0.087 | 0.611             |
| Living situation                                     |        |       |                   |
| Reference: Parents' home                             |        |       |                   |
| Own home                                             | -0.014 | 0.116 | 0.902             |
| On-campus residences                                 | -0.054 | 0.107 | 0.615             |
| Renting                                              | -0.141 | 0.069 | <b>0.042</b>      |
| Others                                               | -0.095 | 0.179 | 0.596             |
| <i>No daily breakfast consumption</i>                | -0.261 | 0.057 | <b>&lt; 0.001</b> |
| Age                                                  | 0.008  | 0.005 | 0.108             |
| Male                                                 | -0.215 | 0.066 | <b>0.001</b>      |
| International                                        | -0.310 | 0.129 | <b>0.017</b>      |
| Postgraduate                                         | 0.297  | 0.098 | <b>0.002</b>      |
| Faculty of study                                     |        |       |                   |
| Reference: Health & Medicine                         |        |       |                   |
| Business & Law                                       | -0.200 | 0.092 | <b>0.029</b>      |
| Education & Arts                                     | -0.008 | 0.077 | 0.916             |
| Engineering & Built Environment                      | -0.041 | 0.100 | 0.683             |
| Science                                              | -0.022 | 0.086 | 0.801             |
| Year of program                                      |        |       |                   |
| Reference: 1 <sup>st</sup> year                      |        |       |                   |
| 2 <sup>nd</sup> year                                 | 0.096  | 0.077 | 0.214             |
| 3 <sup>rd</sup> year                                 | -0.060 | 0.078 | 0.443             |
| 4 <sup>th</sup> year                                 | 0.044  | 0.094 | 0.639             |
| 5 <sup>th</sup> year & above                         | 0.047  | 0.107 | 0.661             |
| Living situation                                     |        |       |                   |
| Reference: Parents' home                             |        |       |                   |
| Own home                                             | -0.021 | 0.115 | 0.852             |
| On-campus residences                                 | -0.023 | 0.107 | 0.831             |
| Renting                                              | -0.129 | 0.069 | 0.062             |
| Others                                               | -0.074 | 0.179 | 0.679             |
| <i>Not meeting physical activity recommendations</i> | -0.010 | 0.064 | 0.877             |
| Age                                                  | 0.008  | 0.005 | 0.097             |
| Male                                                 | -0.230 | 0.067 | <b>0.001</b>      |
| International                                        | -0.332 | 0.131 | <b>0.011</b>      |
| Postgraduate                                         | 0.319  | 0.099 | <b>0.001</b>      |
| Faculty of study                                     |        |       |                   |
| Reference: Health & Medicine                         |        |       |                   |
| Business & Law                                       | -0.231 | 0.093 | <b>0.013</b>      |

|                                      |                                |       |              |
|--------------------------------------|--------------------------------|-------|--------------|
| Education & Arts                     | -0.046                         | 0.077 | 0.550        |
| Engineering & Built Environment      | -0.068                         | 0.101 | 0.501        |
| Science                              | -0.045                         | 0.087 | 0.608        |
| Year of program                      |                                |       |              |
| Reference: 1 <sup>st</sup> year      |                                |       |              |
| 2 <sup>nd</sup> year                 | 0.099                          | 0.077 | 0.199        |
| 3 <sup>rd</sup> year                 | -0.043                         | 0.079 | 0.586        |
| 4 <sup>th</sup> year                 | 0.062                          | 0.095 | 0.517        |
| 5 <sup>th</sup> year & above         | 0.054                          | 0.108 | 0.619        |
| Living situation                     |                                |       |              |
| Reference: Parents' home             |                                |       |              |
| Own home                             | -0.020                         | 0.116 | 0.863        |
| On-campus residences                 | -0.043                         | 0.110 | 0.696        |
| Renting                              | -0.144                         | 0.070 | <b>0.040</b> |
| Others                               | -0.098                         | 0.180 | 0.585        |
| Receiving financial support          | 0.011                          | 0.060 | 0.853        |
| <i>Sitting time &gt; 8 hours/day</i> | -0.011                         | 0.060 | 0.851        |
| Age                                  | 0.011                          | 0.005 | <b>0.018</b> |
| Male                                 | -0.228                         | 0.067 | <b>0.001</b> |
| Australian born                      | 0.096                          | 0.087 | 0.267        |
| Faculty of study                     |                                |       |              |
| Reference: Health & Medicine         |                                |       |              |
| Business & Law                       | -0.166                         | 0.095 | 0.081        |
| Education & Arts                     | Automatically excluded by SPSS |       |              |
| Engineering & Built Environment      | -0.018                         | 0.103 | 0.863        |
| Science                              | -0.002                         | 0.089 | 0.980        |
| Year of program                      |                                |       |              |
| Reference: 1 <sup>st</sup> year      |                                |       |              |
| 2 <sup>nd</sup> year                 | 0.098                          | 0.078 | 0.206        |
| 3 <sup>rd</sup> year                 | -0.081                         | 0.078 | 0.301        |
| 4 <sup>th</sup> year                 | 0.019                          | 0.095 | 0.840        |
| 5 <sup>th</sup> year & above         | 0.009                          | 0.107 | 0.930        |
| Living situation                     |                                |       |              |
| Reference: Parents' home             |                                |       |              |
| Own home                             | 0.024                          | 0.117 | 0.839        |
| On-campus residences                 | -0.082                         | 0.108 | 0.450        |
| Renting                              | -0.143                         | 0.069 | <b>0.040</b> |
| Others                               | -0.115                         | 0.181 | 0.525        |

|                                                 |                                |              |                   |
|-------------------------------------------------|--------------------------------|--------------|-------------------|
| Paid work (hours/week)                          | 0.002                          | 0.002        | 0.529             |
| <i>Alcohol (Exceeding single occasion risk)</i> | <b>-0.277</b>                  | <b>0.062</b> | <b>&lt; 0.001</b> |
| Age                                             | 0.005                          | 0.005        | 0.287             |
| Male                                            | -0.211                         | 0.066        | 0.287             |
| International                                   | -0.395                         | 0.132        | <b>0.003</b>      |
| Postgraduate                                    | 0.312                          | 0.101        | <b>0.002</b>      |
| Faculty of study                                |                                |              |                   |
| Reference: Health & Medicine                    |                                |              |                   |
| Business & Law                                  | -0.169                         | 0.094        | 0.073             |
| Education & Arts                                | Automatically excluded by SPSS |              |                   |
| Engineering & Built Environment                 | -0.024                         | 0.101        | 0.811             |
| Science                                         | -0.004                         | 0.088        | 0.968             |
| Year of program                                 |                                |              |                   |
| Reference: 1 <sup>st</sup> year                 |                                |              |                   |
| 2 <sup>nd</sup> year                            | 0.101                          | 0.077        | 0.168             |
| 3 <sup>rd</sup> year                            | -0.038                         | 0.078        | 0.624             |
| 4 <sup>th</sup> year                            | 0.048                          | 0.095        | 0.609             |
| 5 <sup>th</sup> year and above                  | 0.065                          | 0.107        | 0.545             |
| Living situation                                |                                |              |                   |
| Reference: Parents' home                        |                                |              |                   |
| Own home                                        | 0.124                          | 0.106        | 0.242             |
| On-campus residences                            | 0.145                          | 0.112        | 0.196             |
| Renting                                         | Automatically excluded by SPSS |              |                   |
| Others                                          | 0.057                          | 0.179        | 0.749             |
| Paid work (hours/week)                          | < 0.001                        | 0.002        | 0.989             |
| <i>Smoker</i>                                   | <b>-0.393</b>                  | <b>0.113</b> | <b>0.001</b>      |
| Age                                             | 0.011                          | 0.005        | <b>0.018</b>      |
| Male                                            | -0.243                         | 0.062        | <b>0.000</b>      |
| Non-ATSI                                        | -0.023                         | 0.143        | 0.874             |
| Year of program                                 |                                |              |                   |
| Reference: 1 <sup>st</sup> year                 |                                |              |                   |
| 2 <sup>nd</sup> year                            | 0.107                          | 0.077        | 0.167             |
| 3 <sup>rd</sup> year                            | -0.091                         | 0.078        | 0.242             |
| 4 <sup>th</sup> year                            | 0.024                          | 0.094        | 0.802             |
| 5 <sup>th</sup> year and above                  | -0.018                         | 0.106        | 0.865             |
| Living situation                                |                                |              |                   |
| Reference: Parents' home                        |                                |              |                   |
| Own home                                        | 0.036                          | 0.115        | 0.752             |

|                                          |        |       |                   |
|------------------------------------------|--------|-------|-------------------|
| On-campus residences                     | -0.077 | 0.105 | 0.463             |
| Renting                                  | -0.130 | 0.069 | 0.059             |
| Others                                   | -0.110 | 0.180 | 0.540             |
| <i>Not meeting sleep recommendations</i> | -0.163 | 0.068 | <b>0.018</b>      |
| Age                                      | 0.013  | 0.005 | <b>0.007</b>      |
| Male                                     | -0.246 | 0.062 | <b>0.000</b>      |
| Year of program                          |        |       |                   |
| Reference: 1 <sup>st</sup> year          |        |       |                   |
| 2 <sup>nd</sup> year                     | 0.102  | 0.077 | 0.189             |
| 3 <sup>rd</sup> year                     | -0.079 | 0.078 | 0.311             |
| 4 <sup>th</sup> year                     | 0.023  | 0.094 | 0.807             |
| 5 <sup>th</sup> year and above           | -0.023 | 0.107 | 0.828             |
| Living situation                         |        |       |                   |
| Reference: Parents' home                 |        |       |                   |
| Own home                                 | 0.018  | 0.115 | 0.877             |
| On-campus residences                     | -0.088 | 0.105 | 0.405             |
| Renting                                  | -0.154 | 0.068 | <b>0.024</b>      |
| Others                                   | -0.130 | 0.180 | 0.469             |
| <i>Risk Factor Score</i>                 | -0.105 | 0.026 | <b>&lt; 0.001</b> |
| Age                                      | 0.012  | 0.004 | <b>0.001</b>      |
| Male                                     | -0.206 | 0.067 | <b>0.002</b>      |
| Non-ATSI                                 | 0.018  | 0.142 | 0.897             |
| International                            | -0.268 | 0.124 | <b>0.030</b>      |
| Faculty of study                         |        |       |                   |
| Reference: Health & Medicine             |        |       |                   |
| Business & Law                           | -0.172 | 0.092 | 0.061             |
| Education & Arts                         | -0.014 | 0.076 | 0.855             |
| Engineering & Built Environment          | -0.030 | 0.101 | 0.768             |
| Science                                  | -0.023 | 0.087 | 0.792             |
| Year of program                          |        |       |                   |
| Reference: 1 <sup>st</sup> year          |        |       |                   |
| 2 <sup>nd</sup> year                     | 0.097  | 0.077 | 0.206             |
| 3 <sup>rd</sup> year                     | -0.086 | 0.077 | 0.268             |
| 4 <sup>th</sup> year                     | 0.000  | 0.093 | 0.996             |
| 5 <sup>th</sup> year and above           | -0.032 | 0.106 | 0.763             |
| Receiving financial support              | 0.031  | 0.058 | 0.592             |

ATSI; Aboriginal or Torres Strait Islander, <sup>a</sup>  $\beta$ -Coefficient indicates the increase in the dependent variable per unit increase in the independent variable. Significant p-values in **bold**.
